# Supplementary material
Source: HighWire-hosted journal article supplement (https://bmjopen.bmj.com/content/14/4/e083871)

**Supplementary Figure 1. Directed Acyclic Graph (DAG) of the longitudinal association between breastfeeding and ultra-processed foods (UPF) consumption**

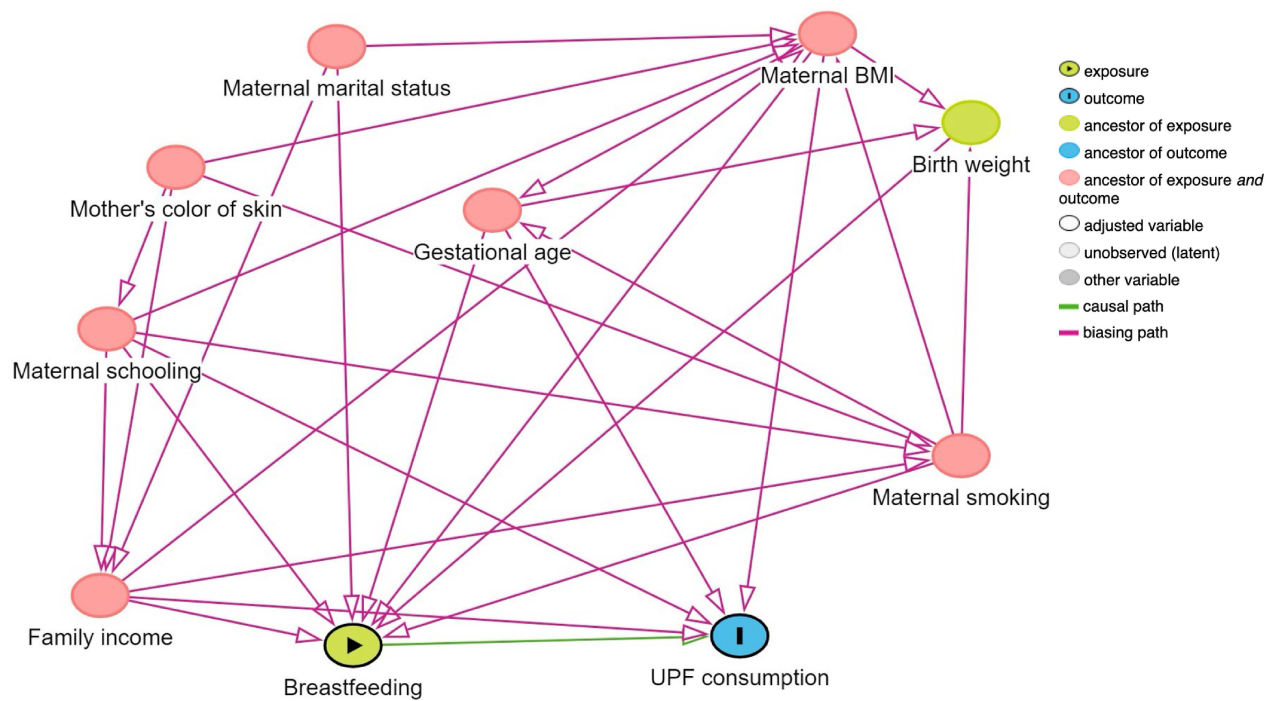

Supplement: inline-supplementary-material-1 [file inline-supplementary-material-1.pdf]
